# Supplementary material for: Enhancing performance of ZnO/NiO UV photodetector by piezo-phototronic effect
Source: Royal Society of Chemistry journal article supplement (doi:10.1039/c6ra07037j), 2016-01-01
Supplement: c6ra07037j1.pdf [file c6ra07037j1.pdf]

**Supporting information**  
**Enhancing performance of ZnO-NiO UV photodetector by piezo-phototronic effect**

<sup>1</sup>*School of Physics and Optoelectronic Technology, Dalian University of Technology, Dalian 116024, China*

<sup>2</sup>*The Key Laboratory for Micro/Nano Technology and System of Liaoning Province, Dalian University of Technology, Dalian 116024, People's Republic of China*

<sup>3</sup>*Department of Electronic Engineering, Dalian Neusoft University of Information, Dalian, 116024, People's Republic of China*

\*Corresponding author: (Lizhong Hu) E-mail: lizhongh@dlut.edu.cn

TEL: 086-0411-84707869 FAX: 086-0411-84709304

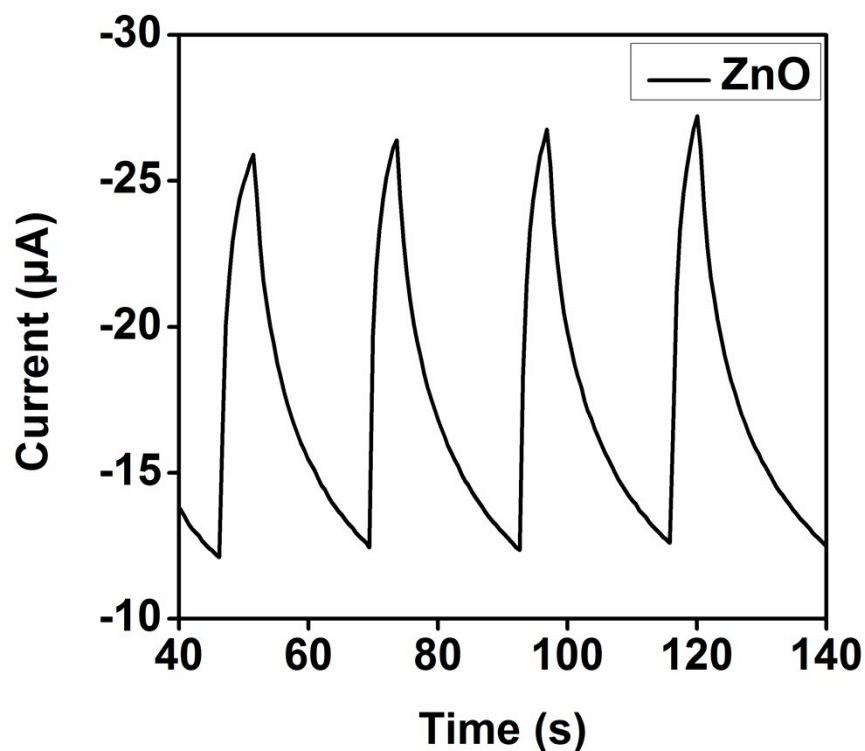

Fig. S1 The performance of the ZnO-only photodetector.

The performance of the ZnO-only photodetector is shown in Fig. S1. It can be found that the decay time of 20s for the ZnO-only photodetector nearly 2 times longer than that of the ZnO/NiO photodetector (10s).
